# Supplementary material for: Genetic architecture of band neutrophil fraction in Iceland
Source: PubMed Central journal article supplement (PMC9160026; doi:10.1038/s42003-022-03462-1), 2022-06-01
Supplement: 42003_2022_3462_MOESM2_ESM.pdf [file 42003_2022_3462_MOESM2_ESM.pdf]

## Supplementary Information

**Supplementary Table 1.** Table showing general statistics of the Band neutrophil fraction phenotype used in the study, stratified by gender and two coding variants in LBR (p.Tyr430Cys and p.Arg76Ter). N: Number of individuals, Mean: The band neutrophil fraction mean value, SD: Standard deviation, Range: the range for band neutrophil fraction values, N meas: number of measurements for band neutrophil fraction, mean N meas.: Mean number of measurements for band neutrophil fraction, AOM: Age of measurement.

|                    | <b>Total phenotype</b> |            |              | <b>rs138769892</b> |            |              | <b>p.Arg76Ter</b> |            |              |
|--------------------|------------------------|------------|--------------|--------------------|------------|--------------|-------------------|------------|--------------|
|                    | <b>All</b>             | <b>Men</b> | <b>Women</b> | <b>All</b>         | <b>Men</b> | <b>Women</b> | <b>All</b>        | <b>Men</b> | <b>Women</b> |
| <b>N</b>           | 88,101                 | 42,370     | 45,731       | 309                | 138        | 171          | 4                 | 2          | 2            |
| <b>Mean (%)</b>    | 8.4                    | 8.4        | 8.4          | 13.7               | 13.4       | 14           | 28.5              | 25.5       | 31.5         |
| <b>25% Q (%)</b>   | 2                      | 2          | 2            | 5                  | 6          | 4.6          | 22.6              | 24.8       | 25           |
| <b>Median (%)</b>  | 5.5                    | 5.5        | 5.5          | 10                 | 10.4       | 10           | 25.5              | 25.5       | 31.5         |
| <b>75% Q (%)</b>   | 11.6                   | 11.6       | 11.6         | 19                 | 18.9       | 19.3         | 31.4              | 26.3       | 38           |
| <b>SD</b>          | 9                      | 9          | 9            | 12.1               | 11.2       | 12.8         | 11.2              | 2.1        | 18.4         |
| <b>Range (%)</b>   | 0;85                   | 0;84       | 0;85         | 0;75               | 0;56       | 0;75         | 18.5;44.5         | 24;27      | 18.5;44.5    |
| <b>N meas</b>      | 258,312                | 126,698    | 131,614      | 956                | 477        | 479          | 16                | 4          | 12           |
| <b>Mean N meas</b> |                        |            |              |                    |            |              |                   |            |              |
| <b>meas</b>        | 2.9                    | 3          | 2.9          | 3.1                | 3.5        | 2.8          | 4                 | 2          | 6            |
| <b>AOM 25% Q</b>   | 13                     | 7          | 18           | 43                 | 64         | 75           | 56                | 60         | 56           |
| <b>AOM median</b>  | 52                     | 52         | 52           | 45                 | 65         | 77           | 56                | 69         | 56           |
| <b>AOM 75% Q</b>   | 72                     | 71         | 72           | 39                 | 61         | 72           | 63                | 69         | 57           |

**Supplementary Table 2.** Heritability (additive model) estimated for band neutrophil proportion using parent-offspring regression and sibling regression, SE: standard error

| <b>Phenotype</b>         | <b>Heritability, parent-offspring regression (SE)</b> | <b>Heritability, full sibling regression (SE)</b> |
|--------------------------|-------------------------------------------------------|---------------------------------------------------|
| Band neutrophil fraction | 0.10 [95% CI: 0.08-0.12]                              | 0.14 [95% CI: 0.12-0.17]                          |

**Supplementary Table 3.** Genetic correlation between band neutrophil fraction from Iceland and eight quantitative blood traits from the UK using LD score regression.

| <b>Secondary trait</b> | Neutrophil bands |        |                 |
|------------------------|------------------|--------|-----------------|
|                        | $r_g$            | SE     | <i>P</i> -value |
| Basophils              | 0.1322           | 0.0824 | 0.1088          |
| Eosinophils            | 0.0377           | 0.0673 | 0.5753          |
| Lymphocytes            | -0.0628          | 0.0612 | 0.3054          |
| Monocytes              | -0.0591          | 0.0557 | 0.2887          |
| Neutrophils            | 0.142            | 0.0645 | 0.0278          |
| Platelets              | 0.0112           | 0.0432 | 0.7947          |
| Red blood cells        | 0.0609           | 0.0585 | 0.2978          |
| White blood cells      | 0.0913           | 0.0636 | 0.1509          |

$r_g$  = genetic correlation, SE= standard error

**Supplementary Table 4.** Protein quantitative trait loci (pQTL) signals conferred by the band neutrophil fraction associated variants or by variants highly correlated with the band neutrophil fraction associated variants. Results from measurements of 4,730 plasma proteins measured in 35,559 Icelanders using SOMAscan. Effect is shown for the minor allele in standard deviations. Loci: the loci or genomic region the variant belongs to, probe target: protein target the probe targets, target gene: the gene encoding the protein target, mLog10(pval): logarithm base 10 of the P-value.

| Variant                       | Loci          | pQTL marker (Hg38)            | R2   | Probe Target                                              | Target gene    | Gene chromosome | Cis or trans | Effect (SD) | mLog10(pval) |
|-------------------------------|---------------|-------------------------------|------|-----------------------------------------------------------|----------------|-----------------|--------------|-------------|--------------|
| rs724781<br>(chr1:153363542)  | <i>S100A9</i> | rs3014874<br>(chr1:153365467) | 0.87 | Lipocalin 2                                               | <i>LCN2</i>    | chr9            | trans        | 0.06        | 9.2          |
| rs724781<br>(chr1:153363542)  | <i>S100A9</i> | rs3014874<br>(chr1:153365467) | 0.87 | Protein S100-A12                                          | <i>S100A12</i> | chr1            | cis          | -0.22       | 114.81       |
| rs12613605<br>(chr2:43131771) | <i>2p21</i>   | rs13390874<br>(chr2:43126091) | 0.96 | Eosinophil cationic protein                               | <i>RNASE3</i>  | chr14           | trans        | 0.06        | 9.28         |
| rs12613605<br>(chr2:43131771) | <i>2p21</i>   | rs13390874<br>(chr2:43126091) | 0.96 | Resistin                                                  | <i>RETN</i>    | chr19           | trans        | 0.09        | 18.84        |
| rs12613605<br>(chr2:43131771) | <i>2p21</i>   | chr2:43132699                 | 0.93 | Peptidoglycan recognition protein 1                       | <i>PGLYRP1</i> | chr19           | trans        | 0.06        | 11.13        |
| rs7846314<br>(chr8:60738272)  | <i>CHD7</i>   | chr8:60733793                 | 0.99 | Carcinoembryonic antigen-related cell adhesion molecule 8 | <i>CEACAM8</i> | chr19           | trans        | 0.21        | 84.46        |
| rs7846314<br>(chr8:60738272)  | <i>CHD7</i>   | chr8:60733793                 | 0.99 | Lactotransferrin                                          | <i>LTF</i>     | chr3            | trans        | 0.06        | 9.26         |
| rs7846314<br>(chr8:60738272)  | <i>CHD7</i>   | rs13256023<br>(chr8:60735992) | 0.99 | Pappalysin-1                                              | <i>PAPPA</i>   | chr9            | trans        | -0.13       | 33.61        |
| rs7846314<br>(chr8:60738272)  | <i>CHD7</i>   | rs13256023<br>(chr8:60735992) | 0.99 | EMBP                                                      | <i>PRG2</i>    | chr11           | trans        | -0.06       | 9.6          |
| rs7846314<br>(chr8:60738272)  | <i>CHD7</i>   | rs13256023<br>(chr8:60735992) | 0.99 | Proteoglycan 3                                            | <i>PRG3</i>    | chr11           | trans        | -0.12       | 31.29        |
| rs7846314<br>(chr8:60738272)  | <i>CHD7</i>   | rs7846314<br>(chr8:60738272)  | 1.00 | Lipocalin 2                                               | <i>LCN2</i>    | chr9            | trans        | 0.08        | 14.85        |
| rs36084354<br>(chr19:1079960) | <i>HMHA1</i>  | rs36084354<br>(chr19:1079960) | 1.00 | sL-Selectin                                               | <i>SELL</i>    | chr1            | trans        | 0.07        | 9.19         |

**Supplementary Table 5.** Conditional analysis of the variants in the Icelandic dataset representing associations with band neutrophil fraction, where each variant is tested with the other variants on the locus associated with the trait as covariates. All but two LBR variants  $r^2 < 0.02$  (rs41268715[C] and rs80028106[T]  $r^2 = 0.17$ ). Effect is shown for the minor allele in standard deviations. HGVS: Human genome variation society nomenclature; LD-class: total number of variants correlating with  $R^2 > 0.8$  to the variant (stratified by functional impact class, where HIGH impact variants include stop-gained, frameshift, splice acceptor or donor; MODerate impact variants include missense, splice-region variants and in-frame indels; LOW impact variants include upstream and downstream variants; and LOWEST impact variants include intron and intergenic variants); Amin: Minor allele; Amaj: Major allele

| Rs_name     | Position(Hg38) | Gene or loci | HGVS                       | LD class         | Amin/ Amaj | P unadjusted | P adjusted | Effect unadjusted | Effect adjusted |
|-------------|----------------|--------------|----------------------------|------------------|------------|--------------|------------|-------------------|-----------------|
| rs724781    | chr1:153363542 | S100A9       | .                          | 7 (0/0/5/2)      | G/C        | 6.6E-12      | .          | -0.05             | .               |
| rs2245425   | chr1:179889309 | TOR1AIP1     | NM_001267578.1:c.554-1G>A  | 74 (1/2/24/47)   | G/A        | 6.9E-08      | .          | 0.03              | .               |
| rs41268715  | chr1:225333399 | DNAH14       | NP_001364.1:p.Glu3232Gln   | 39 (0/2/0/37)    | C/G        | 3.2E-36      | 9.6E-11    | -0.14             | -0.08           |
| rs17522489  | chr1:225346229 | DNAH14       | NP_001364.1:p.Gln3556Arg   | 26 (0/2/0/25)    | G/A        | 5.5E-09      | 8.7E-11    | 0.04              | 0.05            |
| rs14205     | chr1:225401942 | LBR          | NM_194442.2:c.*1361T>C     | 18 (0/1/4/13)    | G/A        | 3.1E-41      | 2.5E-43    | 0.12              | 0.13            |
| rs80028106  | chr1:225402647 | LBR          | NM_194442.2:c.*656G>A      | 4 (0/0/2/2)      | T/C        | 8.6E-30      | 5.9E-11    | -0.24             | -0.15           |
| rs138769892 | chr1:225410316 | LBR          | NP_919424.1:p.Tyr430Cys    | 33 (0/2/5/26)    | C/T        | 9.1E-25      | 1.1E-26    | 0.51              | 0.53            |
| rs12613605  | chr2:43131771  | 2p21         | .                          | 53 (0/0/0/53)    | T/G        | 3.2E-10      | .          | 0.04              | .               |
| rs2036844   | chr5:126776461 | LMNB1        | .                          | 21 (0/0/1/20)    | C/A        | 2.3E-15      | .          | 0.05              | .               |
| rs2561758   | chr5:173778279 | 5q35.2       | .                          | 7 (0/0/0/7)      | A/G        | 6.8E-13      | .          | 0.05              | .               |
| rs757770077 | chr7:65987227  | GUSB         | .                          | 576 (0/0/50/526) | *          | 2.2E-09      | .          | -0.06             | .               |
| rs7846314   | chr8:60738272  | CHD7         | .                          | 4 (0/0/1/3)      | T/A        | 3.6E-16      | .          | 0.06              | .               |
| rs36084354  | chr19:1079960  | HMHA1        | NP_001245257.1:p.Met531Ile | 3 (0/1/1/1)      | A/G        | 3.1E-14      | .          | 0.07              | .               |

\*CTTTCTTTCTTTCTTTCTTTTCTTTT!

**Supplementary Table 6:** Linkage disequilibrium between variants at the LBR locus displayed as correlation ( $r^2$ )

| Variant<br>(rs number) | Position<br>(Hg38) | LD ( $r^2$ ) |            |          |            |             |
|------------------------|--------------------|--------------|------------|----------|------------|-------------|
|                        |                    | rs41268715   | rs17522489 | rs14205  | rs80028106 | rs138769892 |
| rs41268715             | chr:1225333399     | 1.00         | -          | -        | -          | -           |
| rs17522489             | chr1:225346229     | 0.01906      | 1.00       | -        | -          | -           |
| rs14205                | chr1:225401942     | 0.010133     | 0.028841   | 1.00     | -          | -           |
| rs80028106             | chr1:225402647     | 0.168816     | 0.004808   | 0.002673 | 1.00       | -           |
| rs138769892            | chr1:225410316     | 0.000246     | 0.000886   | 0.000472 | 0.000065   | 1.00        |

**Supplementary Table 7: Pelger Huët Pedigree in Iceland.**

| Individual | Pelger-Huët | Band neutrophil level |            | Arg76Ter status |
|------------|-------------|-----------------------|------------|-----------------|
|            |             | Standardised (SD)     | Percentile |                 |
| I.1        | Unknown     | -                     | -          | Unknown         |
| I.2        | Unknown     | -                     | -          | Unknown         |
| II.1       | Unknown     | -                     | -          | Obligate        |
| II.2       | Unknown     | -                     | -          | Unknown         |
| II.3       | Unknown     | -                     | -          | Unknown         |
| II.4       | Unknown     | -                     | -          | Unknown         |
| II.5       | Unknown     | -                     | -          | Unknown         |
| II.6       | Unknown     | -                     | -          | Obligate        |
| III.1      | Unknown     | -                     | -          | Unknown         |
| III.2      | Unknown     | -                     | -          | Obligate        |
| III.3      | Unknown     | -                     | -          | Unknown         |
| III.4      | Unknown     | -                     | -          | Unknown         |
| III.5      | Unknown     | -                     | -          | Obligate        |
| III.6      | Unknown     | -                     | -          | Unknown         |
| IV.1       | Yes         | -                     | -          | Obligate        |
| IV.2       | Unknown     | -                     | -          | Unknown         |
| IV.3       | Unknown     | -                     | -          | Unknown         |
| IV.4       | Unknown     | -                     | -          | Obligate        |
| V.1        | Yes         | -                     | -          | Obligate        |
| V.2        | Unknown     | 1.10                  | 86th       | Unknown         |
| V.3        | Yes         | -                     | -          | Obligate        |
| V.4        | Unknown     | -                     | -          | Unknown         |
| V.5        | Yes         | -                     | -          | Obligate        |
| V.6        | Unknown     | -                     | -          | Unknown         |
| V.7        | Unknown     | -                     | -          | Unknown         |
| V.8        | Yes         | -                     | -          | Unknown         |
| V.9        | No          | -                     | -          | Unknown         |
| V.10       | Unknown     | -                     | -          | Unknown         |
| V.11       | Yes         | -                     | -          | Unknown         |
| V.12       | Unknown     | -                     | -          | Unknown         |
| V.13       | Yes         | -                     | -          | Obligate        |
| V.14       | No          | -                     | -          | Non-carrier     |
| VI.1       | Unknown     | -                     | -          | Unknown         |
| VI.2       | Yes         | 2.40                  | 99th       | Carrier         |
| VI.3       | Yes         | 2.20                  | 98th       | Unknown         |
| VI.4       | No          | -                     | -          | Non-carrier     |
| VI.5       | Yes         | 1.30                  | 91st       | Carrier         |
| VI.6       | No          | -                     | -          | Non-carrier     |
| VI.7       | Unknown     | -                     | -          | Unknown         |
| VI.8       | Yes         | -                     | -          | Carrier         |
| VI.9       | No          | 2.10                  | 98th       | Unknown         |
| VI.10      | No          | -                     | -          | Non-carrier     |
| VI.11      | No          | -                     | -          | Non-carrier     |
| VI.12      | No          | -                     | -          | Non-carrier     |
| VI.13      | No          | -                     | -          | Non-carrier     |
| VI.14      | No          | 0.52                  | 70th       | Unknown         |
| VI.15      | No          | -                     | -          | Non-carrier     |
| VI.16      | No          | 1.30                  | 91st       | Unknown         |
| VI.17      | No          | 0.33                  | 63rd       | Unknown         |
| VI.18      | Yes         | -                     | -          | Unknown         |
| VI.19      | Yes         | -                     | -          | Unknown         |
| VI.20      | Yes         | -                     | -          | Carrier         |
| VI.21      | Yes         | 1.00                  | 85th       | Carrier         |
| VII.1      | Unknown     | -                     | -          | Carrier         |
| VII.2      | Unknown     | -                     | -          | Unknown         |
| VII.3      | Unknown     | 1.60                  | 94th       | Carrier         |
| VII.4      | Unknown     | -                     | -          | Carrier         |
| VIII.1     | Unknown     | 2.00                  | 97th       | Unknown         |

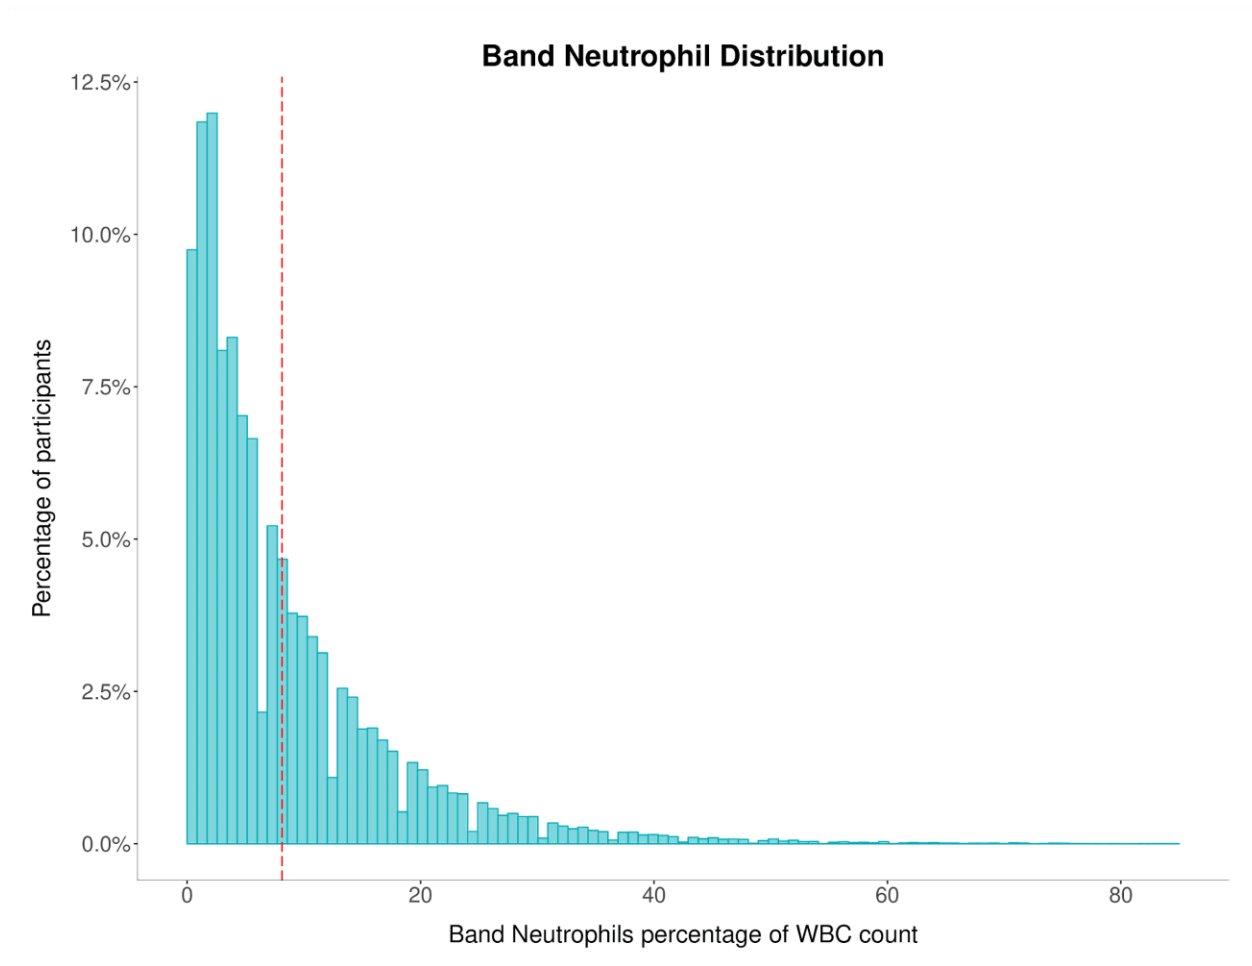

**Supplementary Figure 1.** Distribution of mean band neutrophil fraction per individual (N = 88,101) in the Icelandic population. Y-axis represents the fraction of individuals with band neutrophil fraction assessments. X-axis represents the band neutrophil fraction. Red dashed line shows the median band neutrophil fraction in the population. Band neutrophil fraction is defined as the percentage of WBC count made up of band neutrophils.

LBR:NP\_002287.2

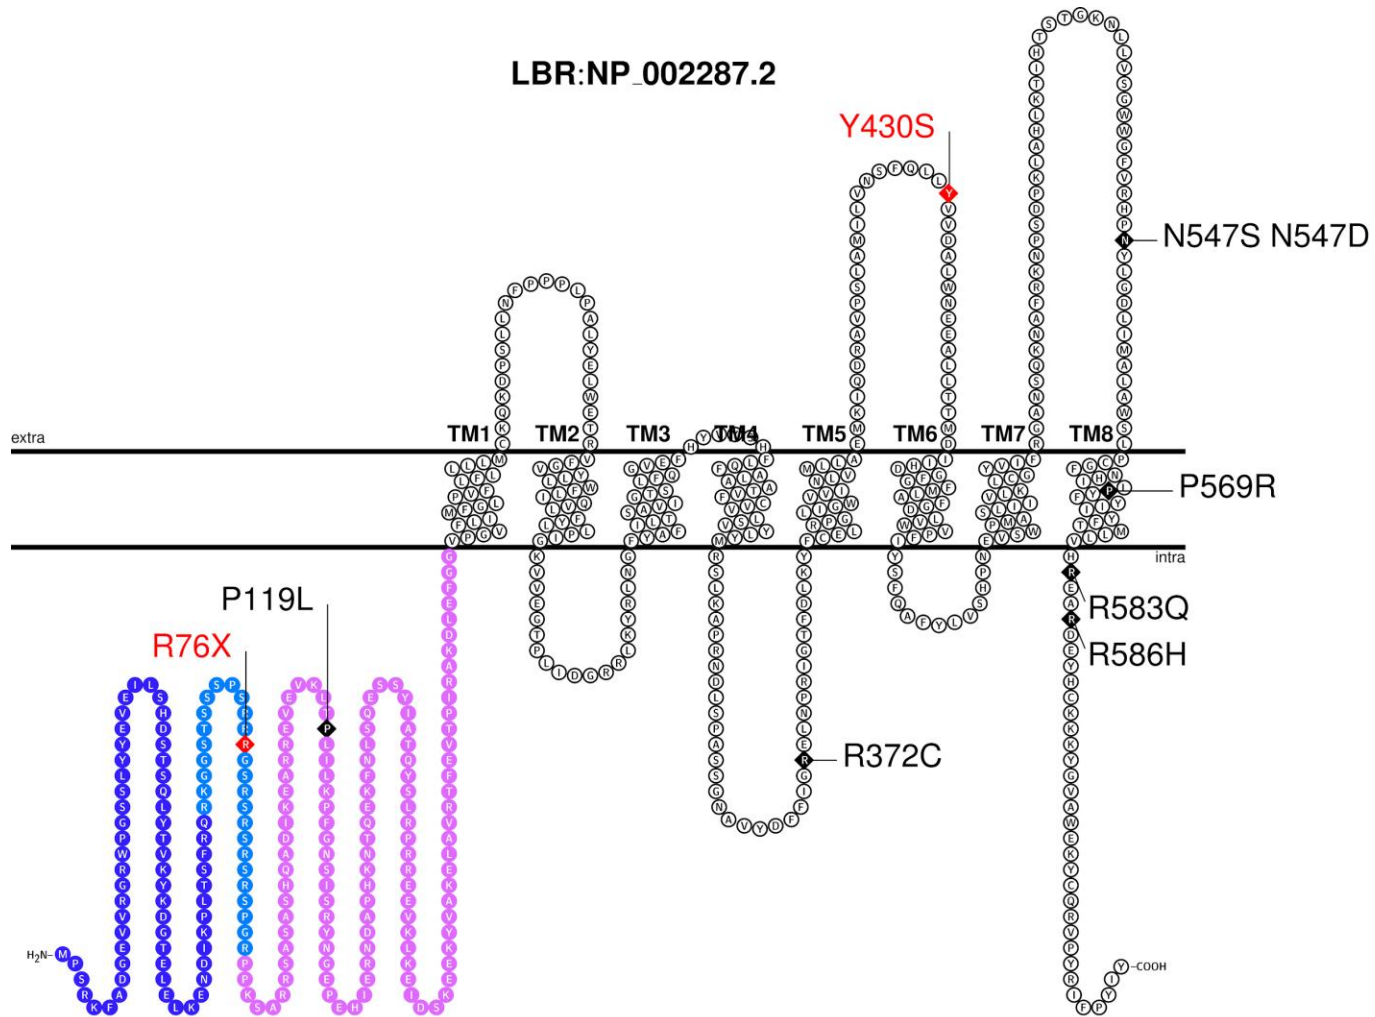

- ◆ Variants reported in current study
- ◆ Disease causing variants
- TUDOR domain
- Arginine/Serine region
- Globular region II



**Supplementary Figure 2.** Schematic figure depicting the structure of the lamin B receptor (LBR:NP\_002287.2) anchored to the inner nuclear membrane. LBR consists of an N-terminal nucleoplasmic domain interacting with lamin B and the heterochromatin (TUDOR domain: aa. 1-61, arginine/serine region: aa. 63-89, and second globular region: aa. 90-211 ), followed by eight transmembrane (TM) segments with sterol reductase activity, and a C-terminal nucleoplasmic domain<sup>1</sup>. Mutations reported in cases of Pelger-Huët and/or Greenberg dysplasia are shown on the figure and implicated by their amino acid substitution. The rare missense variant Y430S (MAF: 0.33%), associated with band neutrophil fraction in the Icelandic population, has not been reported in cases of Pelger-Huët anomaly nor Greenberg dysplasia. The stop-gained variant R76X is the causal mutation for a familial Pelger-Huët anomaly previously reported in articles published in 1963 and 1977 by Jensson & Arnason<sup>2</sup> and Jensson et. al.<sup>2,3</sup>, respectively.

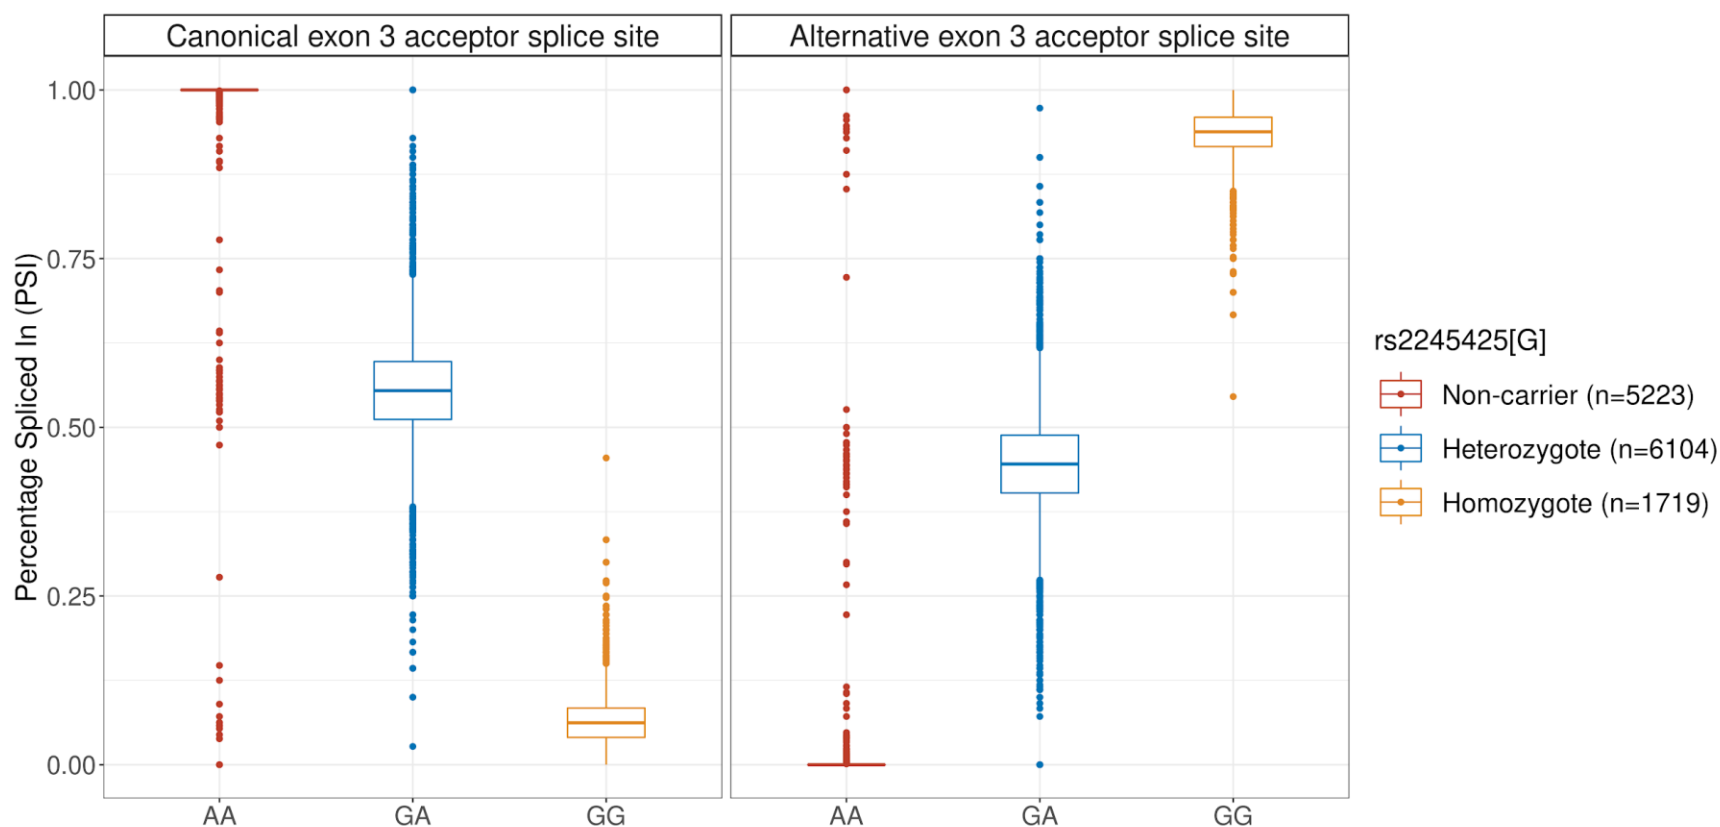

**Supplementary Figure 3.** Quantification of proportional usage (percentage spliced in values) of the two alternative acceptor splice sites of exon 3 in *TOR1AIP1* starting from exon 2, stratified by rs2245425[G] genotype. The usage of the alternative acceptor splice site of exon 3 increases significantly (effect = 1.28,  $p < 1 \times 10^{-300}$ ) while the canonical acceptor splice site of exon 3 decreases accordingly (effect = -1.28,  $p < 1 \times 10^{-300}$ ). After removing 82 samples due to lack of expression, 13,046 samples were used for the analysis (Methods). The hinges of the boxes represent the quartiles of the distribution, and whiskers represent the highest and lowest point no further than 1.5 times the interquartile range from the upper and lower hinges, respectively.

# TOR1AIP1 – Canonical isoform (ENST00000435319)

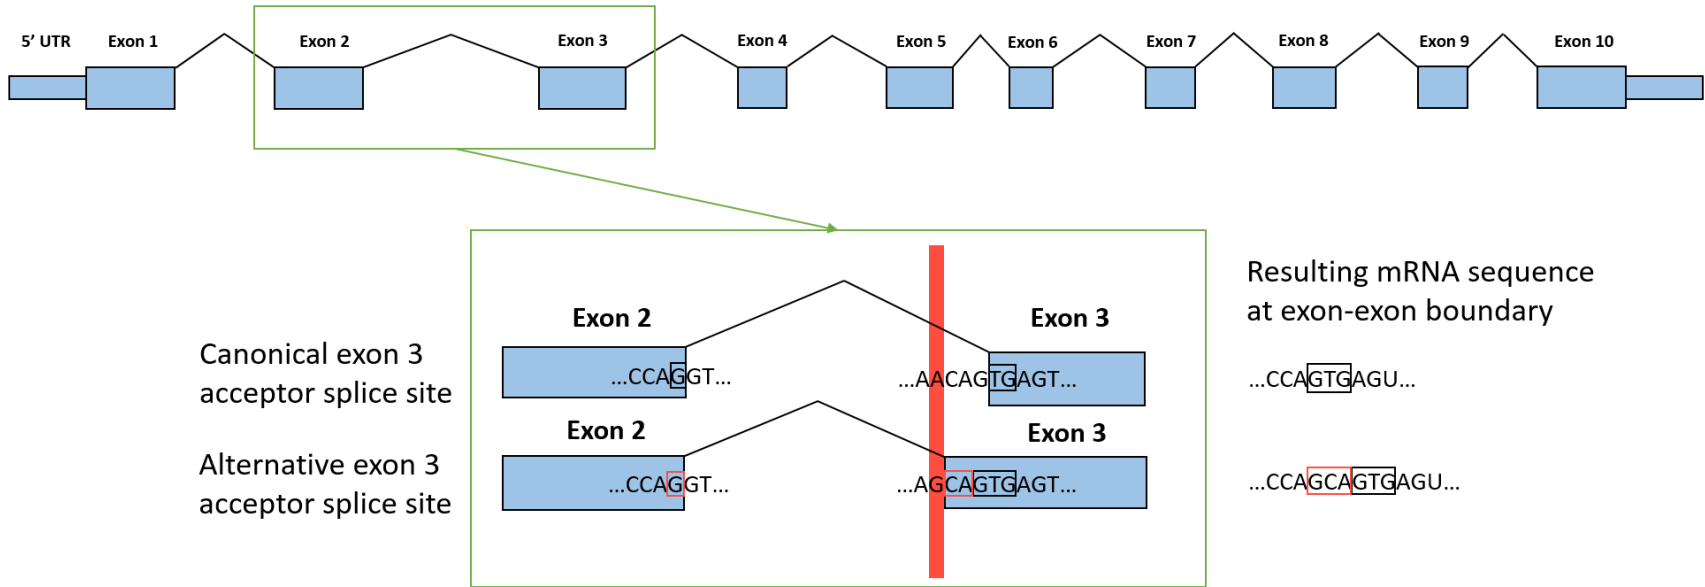

**Supplementary Figure 4.** A schematic illustration of the effect of rs2245425[G] in *TOR1AIP1* on RNA-splicing. Exons are enumerated according to ENST00000435319, the canonical isoform in whole blood (the isoform with the highest median expression in whole blood). The variant is located four base pairs upstream of exon 3, inducing a splice site three base pairs upstream, adding Arginine (GCA) to the resulting mRNA isoform. Note that the alternatively spliced isoform is annotated in ENSEMBL (ENST00000528443).

### Supplementary references

1. Nikolakaki, E., Mylonis, I. & Giannakouros, T. Lamin B Receptor: Interplay between Structure, Function and Localization. *Cells* **6**, (2017).
2. Jensson, O. & Arnason, K. [AN ICELANDIC PELGER ANOMALY FAMILY]. *Laeknabladid* **47**, 97–101 (1963).
3. Jensson, O., Arnason, K., Jóhannesson, G. M. & Ulfarsson, J. Studies on the Pelger anomaly in Iceland. *Acta Med. Scand.* **201**, 183–185 (1977).
